# Supplementary material for: Hypoglycemia After Initiation of Basal Insulin in Patients with Type 2 Diabetes in the United States: Implications for Treatment Discontinuation and Healthcare Costs and Utilization
Source: Springer Nature journal article supplement (doi:10.1007/s12325-017-0592-x), 2017-08-04
Supplement: MOESM1 [file 13349860]

**Appendix 1.** Study cohort selection chart


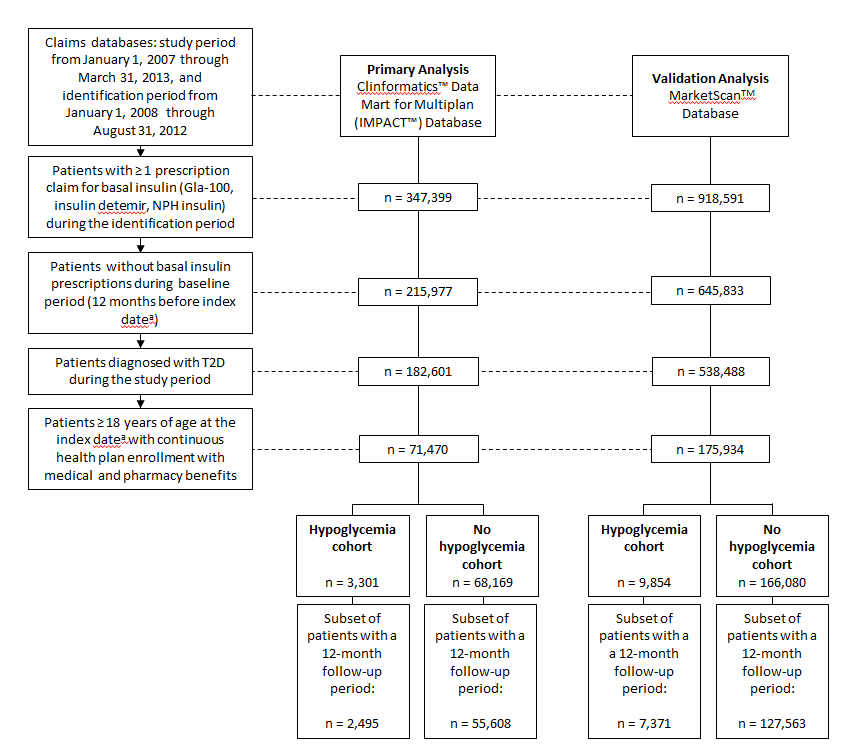


aThe index date corresponded to the first basal insulin prescription date.

Gla-100 = insulin glargine 100 U/mL; NPH = Neutral Protamine Hagedorn; T2D = type 2 diabetes.

**Appendix 2.** Month of first hypoglycemic event diagnosed after starting basal insulin therapy amongst patients in the “hypoglycemia” cohort
